# Supplementary material
Source: publisher site journal article supplement (https://www.dovepress.com/article/330960)
Supplement: Supplementary file 1 [file get_supplementary_file.php]

Appendix S1 Summary of Chromosomal aberrations detected by karyotype analysisa

|  | NT <2.5 mm or <95th |  | NT≥2.5mm |  | NT≥95th |  | NT≥99th |  | NT≥3.0mm |  | NT≥3.5mm |  |
| --- | --- | --- | --- | --- | --- | --- | --- | --- | --- | --- | --- | --- |
| T21 | 47, XN,+21 | 23 | 47, XN, +21 | 45 | 47, XN,+21 | 44 | 47, XN,+21 | 37 | 47, XX, +21 | 34 | 47, XN,+21 | 25 |
|  | 47, XN, +21/46, XN | 2 | 47, XN, +21/46, XN | 4 | 47, XN, +21/46, XN | 4 | 47, XN, +21/46, XN | 2 | 47, XN, +21/46, XN | 4 | 47, XN, +21/46, XN | 1 |
|  |  |  |  |  |  |  |  |  |  |  |  |  |
| T18 | 47,XN,+18 | 6 | 47, XN, +18 | 8 | 47, XN, +18 | 8 | 47,XN,+18 | 4 | 47,XN,+18 | 6 | 47, XX, +18 | 4 |
| T13 | 47,XN,+13 | 3 | 47, XN,+13 | 4 | 47, XN,+13 | 3 | 47,XN,+13 | 3 | 47,XN,+13 | 3 | 47, XN, +13 | 3 |
|  |  |  |  |  |  |  |  |  |  |  |  |  |
| Sex chromosomal  abnormality | 45, X | 2 | 45, X | 2 | 45, X | 2 | 45, X | 2 | 45,X | 2 | 45, X | 2 |
| 47, XYY | 5 |  |  |  |  |  |  |  |  |  |  |
| 47,XXX | 8 | 47, XXX | 1 | 47, XXX | 1 |  |  |  |  |  |  |
| 47, XXY | 11 | 47, XXY | 3 | 47, XXY | 3 | 47, XXY | 2 | 47, XXY | 2 |  |  |
| 45,X/47,XXX  45, X/46, XN  45,X/47,XYY/46,XY | 1  2  1 | 45, X/46, XX  45, X/47, XXY/46, XY  45, X /47, XXX | 1  1  1 | 45, X/46, XX  45, X/47, XXY/46, XY | 1  1 | 45, X/46, XX | 1 | 45, X/46, XX | 1 | 45, X/46, XX | 1 |
|  |  | 48, XXYY | 1 | 48, XXYY | 1 | 48, XXYY | 1 | 48, XXYY | 1 | 48, XXYY | 1 |
|  |  |  |  |  |  |  |  |  |  |  |  |
| Others  chromosomal  abnormality | 69, XXY | 1 |  |  |  |  |  |  |  |  |  |  |
| 47, XX, +mar | 1 | 47, XX, +mar | 1 |  |  |  |  |  |  |  |  |
| 47, XY, +mar/46,XY | 1 | 45, X/46, X, +mar | 1 | 45, X/46, X, +mar | 1 | 45, X/46, X, +mar | 1 | 45, X/46, X, +mar | 1 | 45, X/46, X, +mar | 1 |
| 46, XX, del(10)(q26)  46, XX, inv(9), del(11)(p11)[4]/46, XX, inv(9), i(11)(q10)[2]/46, XX, inv(9)[34] | 1  1 | 46, X, del(X)(?p11)mat  46, XX, del18q11.2  46, XN, del(4)(p14) | 1  1  1 | 46, X, del(X)(?p11)mat  46, XX, del18q11.2  46, XN, del(4)(p14) | 1  1  1 | 46, X, del(X)(?p11)mat  46, XX, del18q11.2  46, XN, del(4)(p14) | 1  1  1 | 46, X, del(X)(?p11)mat  46, XX, del18q11.2  46, XN, del(4)(p14) | 1  1  1 | 46, X, del(X)(?p11)mat | 1 |
| 45, XY, der(1)t(1;15)(q44;q14),-15 | 1 | 46, XY, der(15)rob(15;?22)(q10;q10), +22 | 1 | 46, XY, der(15)rob(15;?22)(q10;q10),+22 | 1 | 46, XY, der(15)rob(15;?22)(q10;q10),+22 | 1 | 46, XY, der(15)rob(15;?22)(q10;q10),+22 | 1 | 46, XY, der(15)rob(15;?22)(q10;q10),+22 | 1 |
| 46, XX, t(3;5)(p24.1;p15.2)dn | 1 |  |  | 46, X, t(Y;1)(q12;q12)dn | 1 |  |  |  |  |  |  |
| 46, X, i(X)(q10),9qh+ | 1 |  |  |  |  |  |  |  |  |  |  |
|  |  | 46, XY, inv(1)(p11q21)dn | 1 | 46, XY, inv(1)(p11q21)dn | 1 | 46, XY, inv(1)(p11q21)dn | 1 | 46,XY,inv(1)(p11q21)dn | 1 | 46, XY, inv(1)(p11q21)dn | 1 |
| 47, XY, +2[8]/47, XN, +16[4]/46.XY[73] | 1 |  |  |  |  |  |  |  |  |  |  |
| total |  | 73 |  | 78 |  | 75 |  | 58 |  | 59 |  | 41 |

**Abbreviations**: NT, nuchal translucency; T21, Trisomy 21; T18, Trisomy 18; T13, Trisomy 13;

**Notes:** *a* Summary does not contain chromosomal abnormalities such as balanced translocation or inversion inherited from parents. Chromosomal mosaicism were verified by secondary invasive prenatal diagnosis or other methods.
